# Supplementary material
Source: Springer Nature journal article supplement (https://www.springermedizin.de/resource/supplementary/13012_2011_482_MOESM6_ESM.pdf/9630076)
Supplement: MOESM6 [file 9630076]

**Original TDF**  
12 domains, 112 unique constructs

**Sort tasks**

**Open sort**  
**Task:** Participants sorted constructs into groups of their choice and labelled the groups created according to their content, and gave confidence ratings. **Analysis:** Optimal grouping of constructs identified using Fuzzy Cluster analysis.

**Closed sort**  
**Task:** Participants sorted and rated constructs into the domains defined in the original framework. **Analysis:** Extent to which each construct belongs to original 12 domains was assessed by Discriminant Content Validation (DCV) methods.

Steps taken to validate the framework

**Step 1: Identify domains**

Identify domains that develop naturally out of sorted component constructs when there is no indication of original domain

Identify additional domains not identified in open sort task which have relevant constructs highly rated as belonging to them.

Check congruence with original framework

**Step 2: Establish domain content**

Use construct allocations to clusters to inform content of *newly formed* domains.

Use construct allocations to domains to inform content of *pre-existing* domains.

**Step 3: Finalise domain labels**

Use labels given by participants and domain content to inform *newly formed* domain names

Use domain labels from original framework to inform *pre-existing* domain names

**Refined Framework**  
14 domains  
84 component constructs
